# Supplementary material
Source: PubMed Central journal article supplement (PMC6682830)
Supplement: CJN.14751218SupplementaryData.pdf [file CJN.14751218SupplementaryData.pdf]

*Supplemental material is neither peer-reviewed nor thoroughly edited by CJASN. The authors alone are responsible for the accuracy and presentation of the material.*

## **Supplemental Materials**

### **Efficacy and Safety of Esaxerenone (CS-3150) for the Treatment of Type 2**

#### **Diabetes with Microalbuminuria**

#### ***A Randomized, Double-blind, Placebo-controlled, Phase II Trial***

Sadayoshi Ito, MD, PhD<sup>1</sup>, Kenichi Shikata, MD, PhD<sup>2</sup>, Masaomi Nangaku, MD, PhD<sup>3</sup>,

Yasuyuki Okuda, MPH<sup>4</sup>, Tomoko Sawanobori, BSc<sup>4</sup>

<sup>1</sup> Division of Nephrology, Endocrinology and Vascular Medicine, Department of  
Medicine, Tohoku University School of Medicine, Sendai, Japan

<sup>2</sup> Center for Innovative Clinical Medicine, Okayama University Hospital, Okayama,  
Japan

<sup>3</sup> Division of Nephrology and Endocrinology, Graduate School of Medicine, The  
University of Tokyo, Tokyo, Japan

<sup>4</sup> Daiichi Sankyo Co., Ltd., Tokyo, Japan

**Table of Contents**

Appendices ..... 3

    Appendix 1. Study sites and investigators participating in this study ..... 3

Supplemental Table ..... 7

    Supplemental Table 1. Proportion of participants with missing data..... 7

    Supplemental Table 2. Sensitivity analyses for the missing data in the primary  
    endpoint analysis ..... 8

    Supplemental Table 3. Plasma esaxerenone concentrations ..... 10

Supplemental Figures ..... 11

    Supplemental Figure 1..... 11

    Supplemental Figure 2..... 12

    Supplemental Figure 3..... 13

    Supplemental Figure 4..... 17

## Appendices

### Appendix 1. Study sites and investigators participating in this study

| Medical institution                                                               | Investigator       |
|-----------------------------------------------------------------------------------|--------------------|
| Shimizu-Naika Clinic; Social Medical Corporation                                  | Noriyasu Taya      |
| Sakajiri-Naika Clinic; Social Medical Corporation                                 | Kazuo Yamagata     |
| NTT-East Sapporo Hospital                                                         | So Nagai           |
| Manda Memorial Hospital; Medical Corporation                                      | Kazushi Misawa     |
| Miyanomori Memorial Hospital; Medical Corporation Sanseikai                       | Itaru Maeda        |
| Sapporo Ryokuai Hospital; Hokkaido Health Coop                                    | Fumitaka Shinojima |
| Aoki-Naika Clinic; Social Medical Corporation                                     | Shin Aoki          |
| Onoyuri Clinic; Social Medical Corporation                                        | Yuri Ono           |
| Jiyugaoka YAMADA Clinic, Internal Medicine                                        | Daishiro Yamada    |
| Hasegawa-Naika Clinic; Social Medical Corporation Tousui-kai                      | Atsushi Hasegawa   |
| Ato Internal Medicine Clinic                                                      | Keita Ato          |
| Imamura Clinic                                                                    | Kenichi Imamura    |
| Minami Akatsuka Clinic; Medical Corporation Eiwa-kai                              | Hideo Takahashi    |
| Kozawa Eye Hospital; Medical Corporation                                          | Masakazu Mizutani  |
| Naka Memorial Clinic; Medical Corporation Kensei-kai                              | Takeshi Osonoi     |
| Itabashi Diabetic Medicine and Dermatology Clinic; Medical Corporation Kensei-kai | Naoki Itabashi     |
| Oyama East Clinic; Medical Corporation                                            | Hiroshi Ohashi     |
| Onai-Naika Clinic; Social Medical Corporation Towa-kai                            | Toru Onai          |
| Cardiovascular Hospital of Central Japan; Medical Corporation                     | Yoshiaki Takayama  |
| Sugiura Clinic; Social Medical Corporation                                        | Toshiyuki Sugiura  |
| Shimizu Clinic Fusa; Social Medical Corporation Fusa-no-kai                       | Yukari Shimizu     |
| Funabashi Municipal Medical Center                                                | Hideaki Iwaoka     |

*Supplemental material is neither peer-reviewed nor thoroughly edited by CJASN. The authors alone are responsible for the accuracy and presentation of the material.*

| <b>Medical institution</b>                                                                            | <b>Investigator</b>                                   |
|-------------------------------------------------------------------------------------------------------|-------------------------------------------------------|
| Kashiwa Municipal Hospital; Public Interest Incorporated Foundation, Kashiwa City Medical Corporation | Takeshi Inazawa                                       |
| Kobari General Hospital; Social Medical Corporation Keisyun-kai                                       | Shuichi Watanabe                                      |
| Tokyo Kamata Medical Center; Japan Community Health care Organization                                 | Masato Kawaguchi<br>Nobuyuki Sato<br>Ikutaka Takemoto |
| Japanese Red Cross Medical Center                                                                     | Toru Hiyoshi                                          |
| Sugawara Clinic; Social Medical Corporation Kouken-kai                                                | Masahiro Sugawara                                     |
| Hino Municipal Hospital                                                                               | Marohito Murakami                                     |
| Kato Clinic; Social Medical Corporation Kouji-kai                                                     | Mitsutoshi Kato                                       |
| Seiwa Clinic, Nishi-Arai Hospital; Social Medical Corporation Seiwa-kai Medical Group                 | Tatsushi Sugiura                                      |
| Kitasato University Kitasato Institute Hospital                                                       | Noriaki Watanabe                                      |
| Chiyoda Tomohito Clinic                                                                               | Isao Uchimura                                         |
| AGE Makita Medical Clinic                                                                             | Zenji Makita                                          |
| Tokyo Heart Center, Osaki Hospital; Social Medical Corporation Kanshin-kai                            | Masahiro Endo                                         |
| P-one Clinic; Keiko-kai Medical Corporation                                                           | Kenichi Furihata                                      |
| Tokyo Center Clinic; Social Medical Corporation Chisei-kai                                            | Yumiko Ide                                            |
| Tomonaga Clinic; Social Medical Corporation LifeStyle                                                 | Osamu Tomonaga                                        |
| ToCROM Clinic; Medical Corporation Heishin-kai                                                        | Osamu Matsuoka                                        |
| Shonan-Takai-Naika Clinic; Social Medical Corporation Shobi-kai                                       | Katsumi Takai                                         |
| Matoba Diabetes Clinic; Medical Corporation                                                           | Kiyokazu Matoba                                       |
| Japanese Red Cross Kanazawa Hospital                                                                  | Yasuyuki Nishimura                                    |
| Okamoto-Naika Clinic; Seishin-kai Social Medical Corporation                                          | Mitsuo Imura                                          |
| Suruga Clinic; Social Medical Corporation Rikei-kai                                                   | Akira Yamauchi                                        |
| ASO Clinic                                                                                            | Katsumi Aso                                           |

*Supplemental material is neither peer-reviewed nor thoroughly edited by CJASN. The authors alone are responsible for the accuracy and presentation of the material.*

| <b>Medical institution</b>                                                                                 | <b>Investigator</b>                     |
|------------------------------------------------------------------------------------------------------------|-----------------------------------------|
| Meitetsu Hospital; Nagoya Railroad Health Insurance Association                                            | Hideki Okamoto                          |
| Chubu Rosai Hospital; Japan Labour Health and Welfare Organization                                         | Eitaro Nakashima                        |
| Kasugai Municipal Hospital                                                                                 | Hiromitsu Sasaki                        |
| Toyota Memorial Hospital                                                                                   | Jyunji Shinoda                          |
| Nakayama Clinic                                                                                            | Mikihiro Nakayama                       |
| TOSAKI Clinic for Diabetes and Endocrinology; Medical Corporation TDE                                      | Takahiro Tosaki                         |
| Yokkaichi Hazu Medical Center; Japan Community Health care Organization                                    | Yasuhiro Sumida                         |
| Yokkaichi Diabetes Clinic; To-eli Medical Corporation                                                      | Ryuichi Mizubayashi                     |
| Kyoto City Hospital; Local Incorporated Administrative Agency<br>Kyoto City Hospital Organization          | Akinori Kogure                          |
| Takeda General Hospital; Medical Corporation Ijin-kai                                                      | Nobuyuki Azuma                          |
| Takatsuki Red Cross Hospital                                                                               | Shizuka Kaneko                          |
| Osak Saiseikai Tondabayashi Hospital; Social Welfare Organization Saiseikai Imperial Gift Foundation, Inc. | Takeshi Kubota                          |
| OCROM Clinic; Medical Corporation Heishin-kai                                                              | Shigeto Kaneda                          |
| Nishi-Umeda Clinic for Asian Medical Collaboration near JR<br>Osaka station; Medical Corporation Kyoso-kai | Naohiko Ueda<br>Yoshimitsu Yamasaki     |
| Ikeda Hospital; Social Medical Corporation Seimei-kai                                                      | Hiroki Ikeda                            |
| The Veritas Hospital; Shinshin-kai Medical Corporation                                                     | Keiichiro Tanigawa<br>Mitsuru Tsujimoto |
| Kawanishi City Hospital                                                                                    | Masafumi Koga<br>Yuko Nakamura          |
| Japanese Red Cross Society Matsue Hospital                                                                 | Toshiaki Sato                           |

*Supplemental material is neither peer-reviewed nor thoroughly edited by CJASN. The authors alone are responsible for the accuracy and presentation of the material.*

| <b>Medical institution</b>                                                        | <b>Investigator</b> |
|-----------------------------------------------------------------------------------|---------------------|
| Sanuki Municipal Hospital                                                         | Toshihiko Inoue     |
| Fukuoka Wajiro Hospital; Social Medical Corporation, the Chiyu-kai Foundation     | Masao Ishii         |
| Sugimoto Clinic                                                                   | Hidekatsu Sugimoto  |
| Shin Koga Clinic; Tenjin-kai Social Medical Corporation                           | Shoichi Akazawa     |
|                                                                                   | Eiji Kawasaki       |
| Hirohata Naika Clinic; Medical Corporation                                        | Yoshihide Hirohata  |
| Jinnouchi Hospital Diabetes Care Center; Social Medical Corporation Jinnouchi-kai | Hideaki Jinnouchi   |
| Naika-Abe Clinic; Social Medical Corporation Nobunari-kai                         | Nobuyuki Abe        |
| Tenpozan Naika; Medical Corporation Shoji-kai                                     | Yasuhiro Hashiguchi |
| Fukumoto Clinic; Medical Corporation Kashiwagi-kai                                | Yoshihide Fukumoto  |

## Supplemental Table

**Supplemental Table 1. Proportion of participants with missing data**

|                          | Esaxerenone  |              |              |              |              | All          |
|--------------------------|--------------|--------------|--------------|--------------|--------------|--------------|
|                          | Placebo      | 0.625 mg     | 1.25 mg      | 2.5 mg       | 5 mg         |              |
|                          | <i>n</i> =73 | <i>n</i> =73 | <i>n</i> =73 | <i>n</i> =72 | <i>n</i> =74 |              |
|                          | <i>n</i> (%) |
| No primary efficacy data | 7 (10)       | 4 (5)        | 8 (11)       | 4 (6)        | 15 (20)      | 38 (10)      |

Supplemental material is neither peer-reviewed nor thoroughly edited by CJASN. The authors alone are responsible for the accuracy and presentation of the material.

**Supplemental Table 2. Sensitivity analyses for the missing data in the primary endpoint analysis**

|                        |                      |              |          | Geometric LS  |             | Treatment difference |             |                |
|------------------------|----------------------|--------------|----------|---------------|-------------|----------------------|-------------|----------------|
|                        |                      |              |          | mean ratio to |             | Geometric LS mean    |             |                |
|                        |                      | <i>n</i>     | baseline | 95% CI        |             | ratio to placebo     | 95% CI      | <i>P</i> value |
| Primary                | Placebo              | <i>n</i> =73 | 71       | 0.931         | 0.807–1.074 | -                    | -           | -              |
| analysis<br>(FAS)      | Esaxerenone 0.625 mg | <i>n</i> =71 | 70       | 0.790         | 0.684–0.913 | 0.848                | 0.692–1.040 | 0.113          |
|                        | Esaxerenone 1.25 mg  | <i>n</i> =72 | 71       | 0.616         | 0.533–0.711 | 0.661                | 0.539–0.810 | <0.001         |
|                        | Esaxerenone 2.5 mg   | <i>n</i> =70 | 69       | 0.501         | 0.433–0.579 | 0.537                | 0.439–0.659 | <0.001         |
|                        | Esaxerenone 5 mg     | <i>n</i> =72 | 69       | 0.443         | 0.383–0.512 | 0.475                | 0.388–0.583 | <0.001         |
| Complete case          | Placebo              | <i>n</i> =61 | 61       | 0.927         | 0.794–1.082 | -                    | -           | -              |
| only analysis<br>(PPS) | Esaxerenone 0.625 mg | <i>n</i> =64 | 64       | 0.782         | 0.673–0.909 | 0.844                | 0.680–1.047 | 0.123          |
|                        | Esaxerenone 1.25 mg  | <i>n</i> =61 | 61       | 0.638         | 0.546–0.745 | 0.688                | 0.553–0.857 | <0.001         |
|                        | Esaxerenone 2.5 mg   | <i>n</i> =64 | 64       | 0.497         | 0.428–0.578 | 0.537                | 0.432–0.666 | <0.001         |



Supplemental material is neither peer-reviewed nor thoroughly edited by CJASN. The authors alone are responsible for the accuracy and presentation of the material.

|          |                      |      |    |       |             |       |             |        |
|----------|----------------------|------|----|-------|-------------|-------|-------------|--------|
|          | Esaxerenone 5 mg     | n=55 | 55 | 0.449 | 0.382–0.529 | 0.485 | 0.388–0.606 | <0.001 |
| MMRM     | Placebo              | n=73 | 73 | 0.917 | 0.793–1.062 | -     | -           | -      |
| analysis | Esaxerenone 0.625 mg | n=71 | 71 | 0.792 | 0.685–0.917 | 0.864 | 0.703–1.062 | 0.164  |
| (FAS)    | Esaxerenone 1.25 mg  | n=72 | 72 | 0.624 | 0.538–0.723 | 0.680 | 0.552–0.837 | <0.001 |
|          | Esaxerenone 2.5 mg   | n=70 | 70 | 0.498 | 0.430–0.577 | 0.543 | 0.442–0.668 | <0.001 |
|          | Esaxerenone 5 mg     | n=72 | 72 | 0.435 | 0.373–0.507 | 0.474 | 0.383–0.585 | <0.001 |

CI, confidence interval; FAS, full analysis set; LS, least square; MMRM, mixed effect model repeat measurement; PPS, per protocol set

**Supplemental Table 3. Plasma esaxerenone concentrations**

| Esaxerenone dosage |                  | Esaxerenone concentration (ng/mL) |                   |
|--------------------|------------------|-----------------------------------|-------------------|
|                    |                  | Week 4                            | Week 12           |
| 0.625 mg/day       | <i>n</i>         | 70                                | 67                |
|                    | Mean (SD)        | 4.29 (1.88)                       | 4.43 (1.99)       |
|                    | Median (min–max) | 4.02 (0.0–9.8)                    | 4.00 (0.0–12.8)   |
| 1.25 mg/day        | <i>n</i>         | 69                                | 64                |
|                    | Mean (SD)        | 9.33 (3.55)                       | 9.46 (3.60)       |
|                    | Median (min–max) | 8.91 (3.8–20.2)                   | 9.06 (2.4–20.6)   |
| 2.5 mg/day         | <i>n</i>         | 68                                | 65                |
|                    | Mean (SD)        | 18.28 (7.02)                      | 19.41 (8.94)      |
|                    | Median (min–max) | 17.50 (4.8–39.0)                  | 18.50 (0.3–47.1)  |
| 5 mg/day           | <i>n</i>         | 68                                | 58                |
|                    | Mean (SD)        | 36.80 (15.82)                     | 37.94 (13.02)     |
|                    | Median (min–max) | 34.10 (13.9–84.6)                 | 34.35 (16.1–84.8) |

SD, standard deviation.

## Supplemental figures

Supplemental Figure 1.

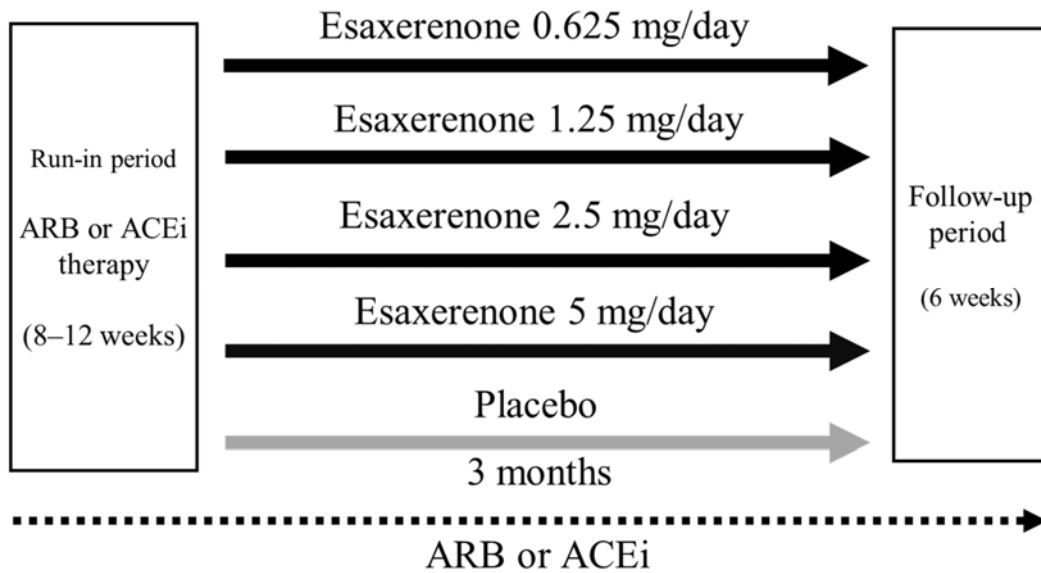

**Study design.** ACEi, angiotensin-converting enzyme inhibitors; ARB, angiotensin receptor blockers.

**Supplemental Figure 2.**

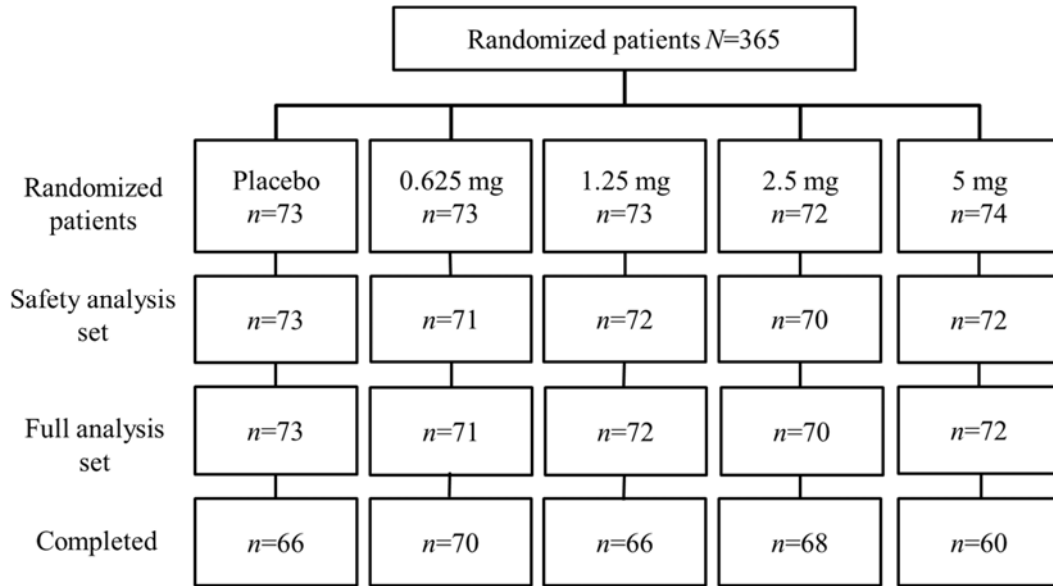

**Participant disposition.**

### Supplemental Figure 3.

a)

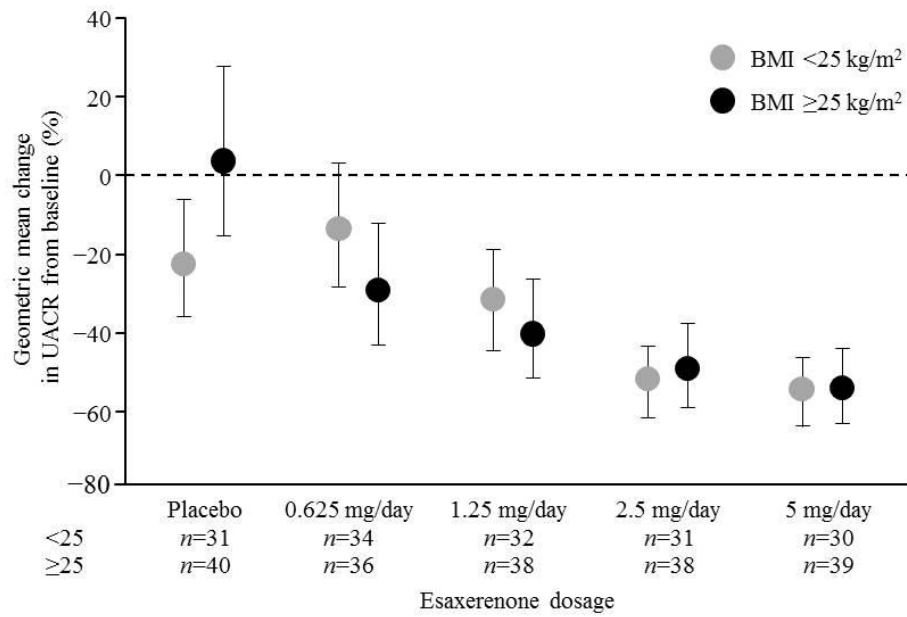

b)

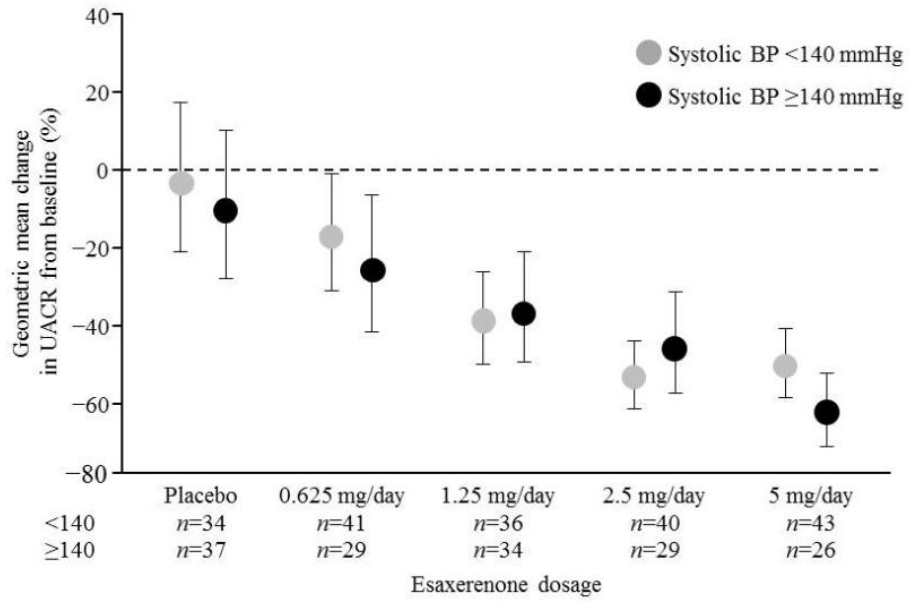

c)

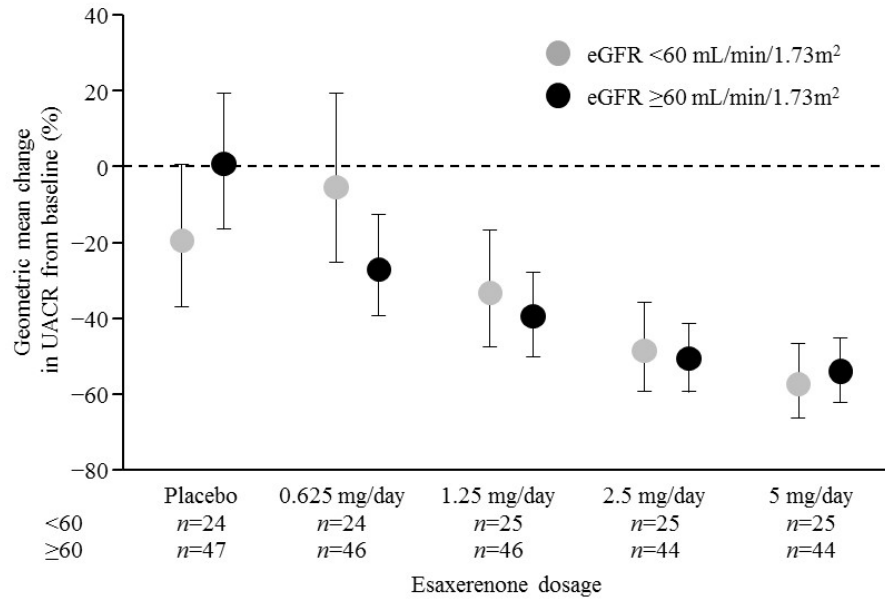

d)

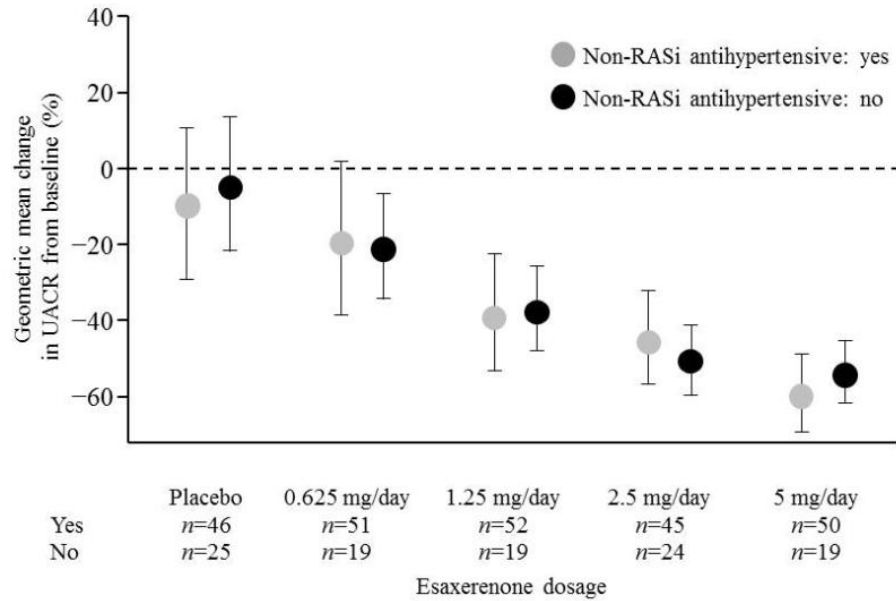

**Change in UACR from baseline stratified by (a) BMI, (b) systolic BP, (c) eGFR, and (d) concurrent use of non-RASi antihypertensive drugs.**

BMI, body mass index; BP, blood pressure; eGFR, estimated glomerular filtration rate;

RASi, renin-angiotensin system inhibitors; UACR, urinary albumin/creatinine ratio



**Supplemental Figure 4.**

a)

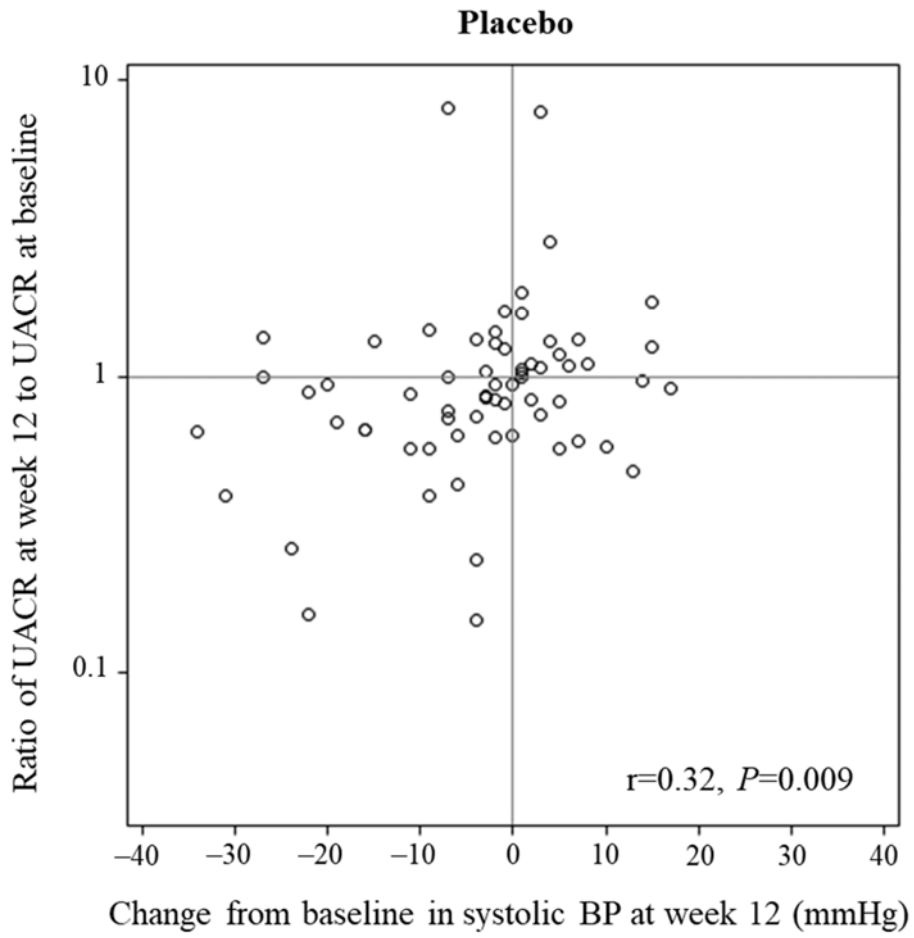

b)

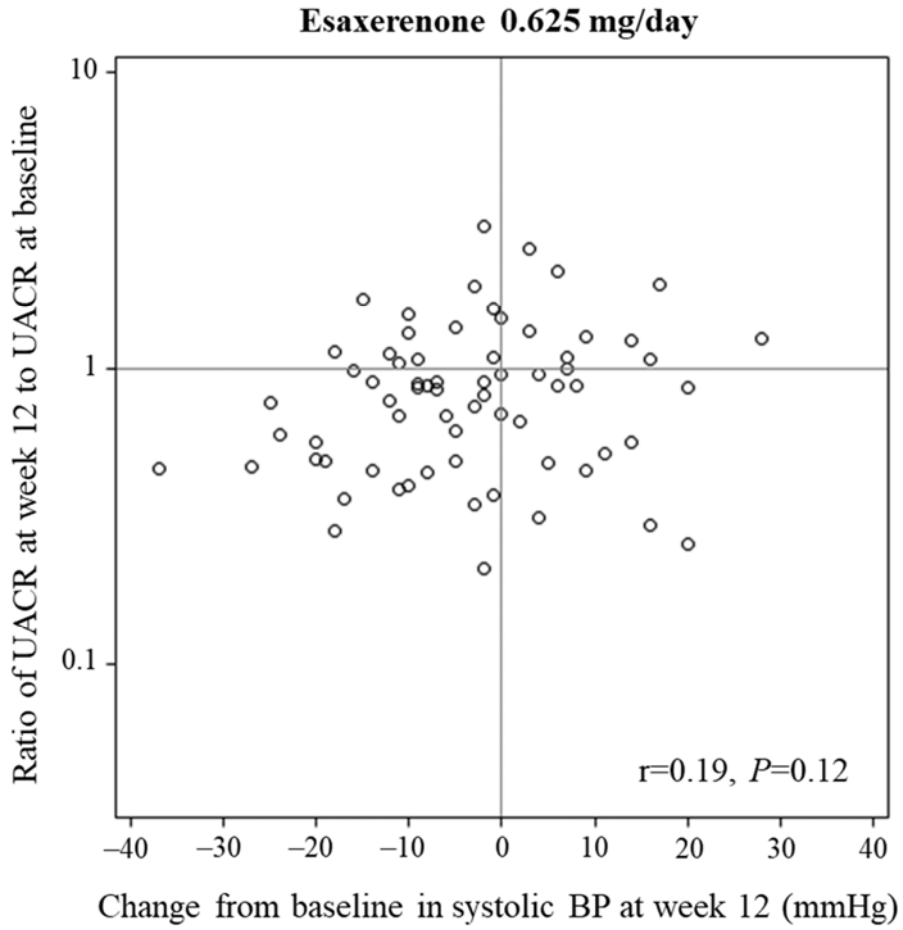

c)

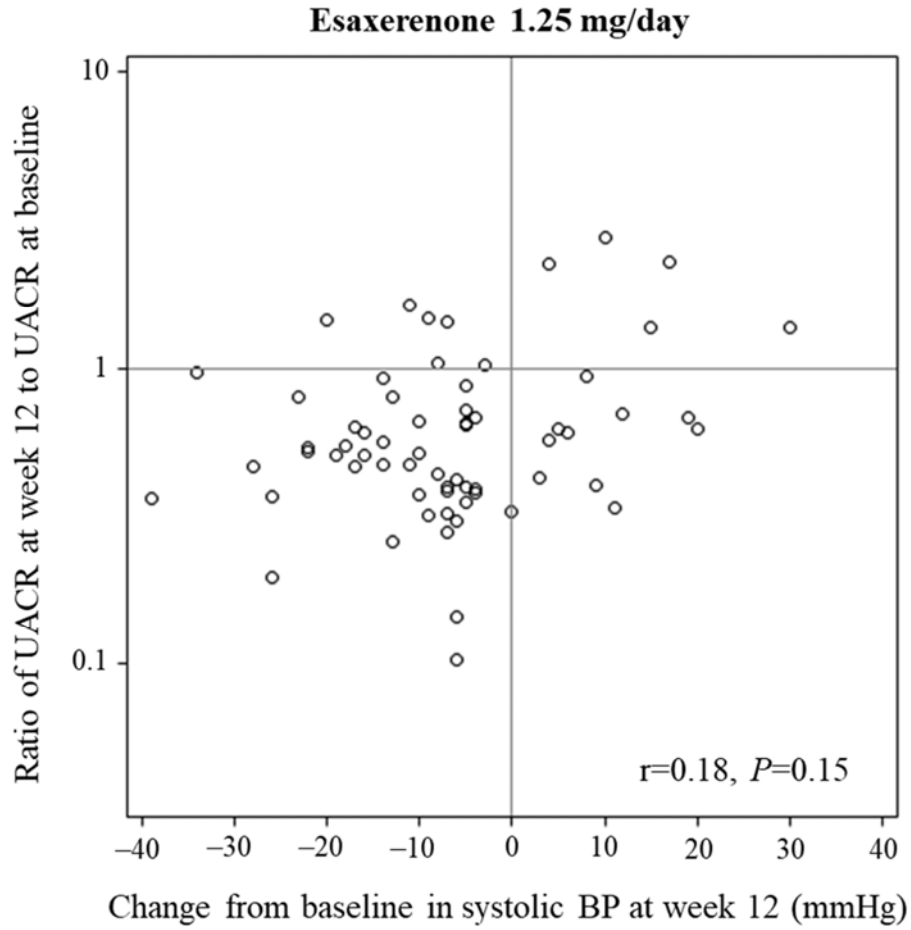

d)

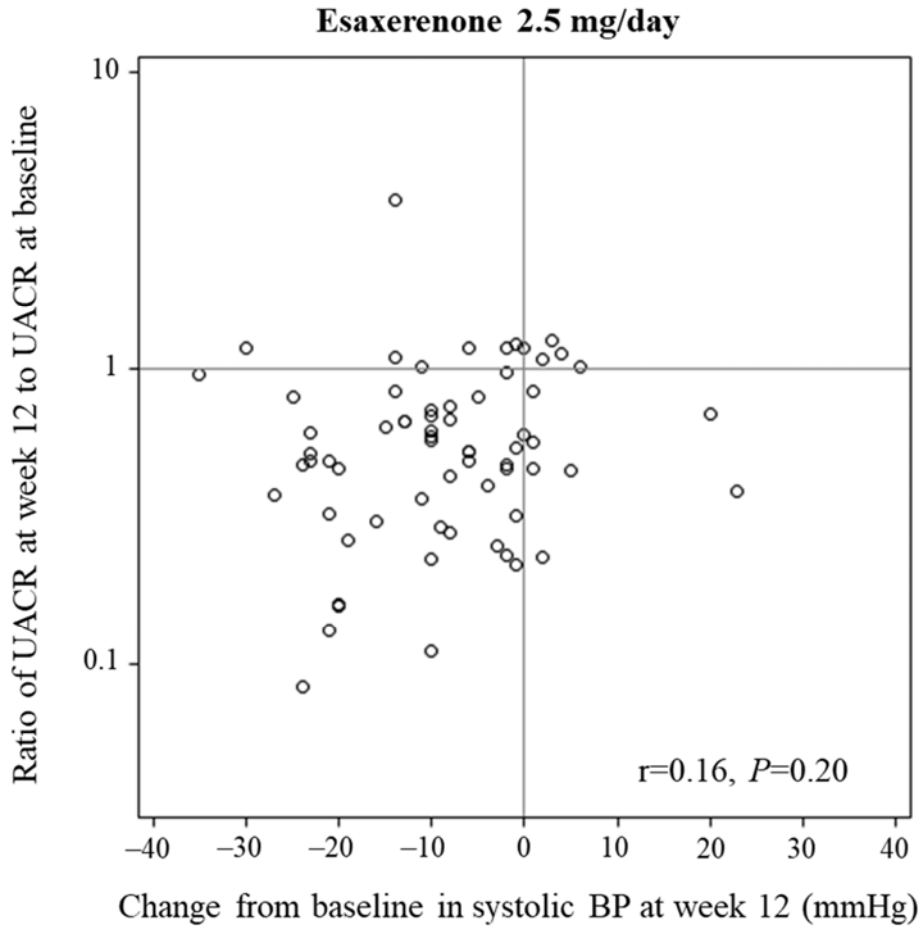

e)

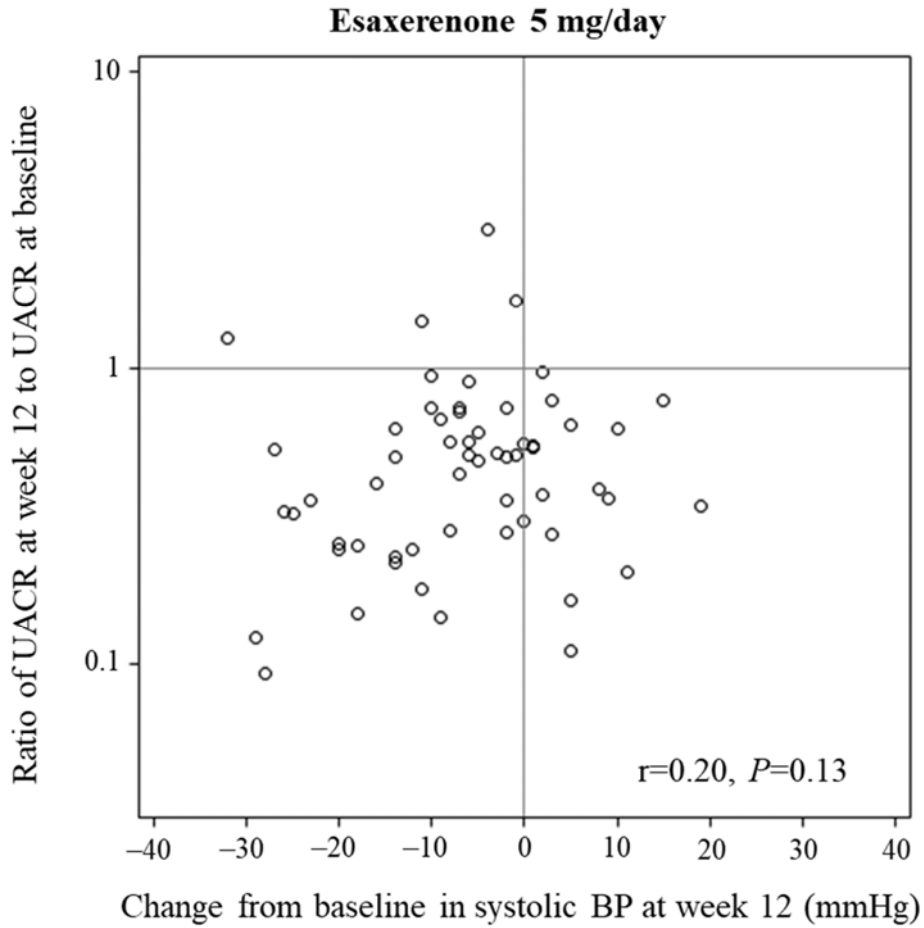

**Association between the ratio to baseline in urinary albumin-creatinine ratio (UACR) and the change from baseline in systolic blood pressure at week 12.**

*Supplemental material is neither peer-reviewed nor thoroughly edited by CJASN. The authors alone are responsible for the accuracy and presentation of the material.*
